# Supplementary material for: Obtaining miRNA from Saliva—Comparison of Sampling and Purification Methods
Source: MDPI journal article supplement (doi:10.3390/ijms24032386), 2023-01-25
Supplement: s1 [file s1]

## Supplementary material

**Table S1.** Values obtained for each individual RNA purification, including amount, purity and efficiency.

| Collector | Kit | Total Volum (μl) | Total RNA (ng) |               | A <sub>260/280</sub> | Efficiency (ng total RNA/μl saliva) | collector   | Kit | Total RNA (ng) |               | A <sub>260/280</sub> | Efficiency (ng total RNA/μl saliva) | collector | Kit | Total RNA (ng) |                | A <sub>260/280</sub> | Efficiency (ng total RNA/μl saliva) |
|-----------|-----|------------------|----------------|---------------|----------------------|-------------------------------------|-------------|-----|----------------|---------------|----------------------|-------------------------------------|-----------|-----|----------------|----------------|----------------------|-------------------------------------|
| 50ml tube | MV  | 20               | 87.12          | 4207.1        |                      | 8.41                                | Salimetrics | MV  | 29.04          | 457.04        | 1                    | 0.91                                | Oragene   | MV  | 514.8          | 1628.8         | 1.84                 | 3.26                                |
| 50ml tube | MV  | 50               | 4120           |               | 1.9                  |                                     | Salimetrics | MV  | 428            |               | 2.54                 |                                     | Oragene   | MV  | 1114           |                | 2.22                 |                                     |
| 50ml tube | MV  | 20               | 10.56          | 798.56        | 0.32                 | 1.60                                | Salimetrics | MV  | 510.84         | 1528.84       | 1.74                 | 3.06                                | Oragene   | MV  | 545.82         | 1355.82        | 1.55                 | 2.71                                |
| 50ml tube | MV  | 50               | 788            |               | 1.81                 |                                     | Salimetrics | MV  | 1018           |               | 1.36                 |                                     | Oragene   | MV  | 810            |                | 2.15                 |                                     |
| 50ml tube | MV  | 20               | 275.88         | 4725.9        | 1.81                 | 9.45                                | Salimetrics | MV  | 907.5          | 2017.5        | 1.8                  | 4.04                                | Oragene   | MV  | 2158.86        | 5108.86        | 1.86                 | 10.22                               |
| 50ml tube | MV  | 50               | 4450           |               | 1.8                  |                                     | Salimetrics | MV  | 1110           |               | 1.42                 |                                     | Oragene   | MV  | 2950           |                | 2.04                 |                                     |
| 50ml tube | MV  | 20               | 506.22         | 1966.2        | 2.37                 | 3.93                                | Salimetrics | MV  | 113.52         | 473.52        | 1.81                 | 0.95                                | Oragene   | MV  | 1716.66        | 2338.66        | 2.17                 | 4.68                                |
| 50ml tube | MV  | 50               | 1460           |               | 2.1                  |                                     | Salimetrics | MV  | 360            |               | 0.84                 |                                     | Oragene   | MV  | 622            |                | 2.14                 |                                     |
| 50ml tube | MV  | 20               | 458.7          | 2870.7        | 2.03                 | 5.74                                | Salimetrics | MV  | 1178.1         | 2078.1        | 1.85                 | 4.16                                | Oragene   | MV  | 939.84         | 1393.84        | 1.67                 | 2.79                                |
| 50ml tube | MV  | 50               | 2412           |               | 1.73                 |                                     | Salimetrics | MV  | 900            |               | 1.49                 |                                     | Oragene   | MV  | 454            |                | 1.54                 |                                     |
|           |     |                  | <b>Average</b> | <b>2913.7</b> |                      | <b>5.83</b>                         |             |     | <b>Average</b> | <b>1311</b>   |                      | <b>2.62</b>                         |           |     | <b>Average</b> | <b>2365.2</b>  |                      | <b>4.73</b>                         |
| 50ml tube | NS  | 20               |                | 1707.2        | 1.73                 | 1.90                                | Salimetrics | NS  |                | 114.4         | 1.14                 | 0.13                                | Oragene   | NS  |                | 2786.4         | 1.98                 | 3.10                                |
| 50ml tube | NS  | 20               |                | 338.4         | 1.67                 | 0.38                                | Salimetrics | NS  |                | 396.8         | 1.78                 | 0.44                                | Oragene   | NS  |                | 912            | 1.71                 | 1.01                                |
| 50ml tube | NS  | 20               |                | 1107.2        | 1.8                  | 1.23                                | Salimetrics | NS  |                | 659.2         | 1.63                 | 0.73                                | Oragene   | NS  |                | 12029.6        | 1.62                 | 13.37                               |
| 50ml tube | NS  | 20               |                | 688           | 1.71                 | 0.76                                | Salimetrics | NS  |                | 81.6          | 0.78                 | 0.09                                | Oragene   | NS  |                | 4294           | 1.85                 | 4.77                                |
| 50ml tube | NS  | 20               |                | 282.4         | 2.04                 | 0.31                                | Salimetrics | NS  |                | 449.6         | 1.9                  | 0.50                                | Oragene   | NS  |                | 4991.2         | 1.58                 | 5.55                                |
|           |     |                  | <b>Average</b> | <b>824.64</b> |                      | <b>0.92</b>                         |             |     | <b>Average</b> | <b>340.32</b> |                      | <b>0.38</b>                         |           |     | <b>Average</b> | <b>5002.64</b> |                      | <b>5.56</b>                         |
| 50ml tube | MR  | 20               |                | 512.8         | 1.83                 | 0.85                                | Salimetrics | MR  |                | 0             | 2.25                 | 0.00                                | Oragene   | MR  |                | 542            | 2.08                 | 0.90                                |
| 50ml tube | MR  | 20               |                | 51.2          | 2.78                 | 0.09                                | Salimetrics | MR  |                | 444.8         | 2.03                 | 0.74                                | Oragene   | MR  |                | 1624           | 1.78                 | 2.71                                |
| 50ml tube | MR  | 20               |                | 929.6         | 1.84                 | 1.55                                | Salimetrics | MR  |                | 760.8         | 1.99                 | 1.27                                | Oragene   | MR  |                | 5144           | 1.9                  | 8.57                                |
| 50ml tube | MR  | 20               |                | 436.8         | 1.98                 | 0.73                                | Salimetrics | MR  |                | 101.6         | 1.53                 | 0.17                                | Oragene   | MR  |                | 4469.6         | 1.72                 | 7.45                                |
| 50ml tube | MR  | 20               |                | 944.8         | 1.98                 | 1.57                                | Salimetrics | MR  |                | 701.6         | 0.36                 | 1.17                                | Oragene   | MR  |                | 1398           | 0.83                 | 2.33                                |
|           |     |                  | <b>Average</b> | <b>575.04</b> |                      | <b>0.96</b>                         |             |     | <b>Average</b> | <b>401.76</b> |                      | <b>0.67</b>                         |           |     | <b>Average</b> | <b>2635.52</b> |                      | <b>4.39</b>                         |

**Table S2.** P-values corresponding to the comparison of the total RNA amount obtained by the different combinations of saliva collectors and miRNA extraction kits applying the Wilcoxon Signed Rang test. In red,  $p < 0.05$  (statistically not significant); in green, statistically significant p-values.

|             |    | 50ml tube |        |        | Salimetrics |        |        | Oragene |        |        |
|-------------|----|-----------|--------|--------|-------------|--------|--------|---------|--------|--------|
|             |    | MV        | NS     | MR     | MV          | NS     | MR     | MV      | NS     | MR     |
| 50ml tube   | MV | -         | 0,0317 | 0,0317 | 0,151       | 0,0079 | 0,0079 | 0,6915  | 0,421  | 0,548  |
|             | NS | -         | -      | 0,691  | 0,309       | 0,222  | 0,421  | 0,0556  | 0,0317 | 0,151  |
|             | MR | -         | -      | -      | 0,222       | 0,421  | 0,548  | 0,0079  | 0,0317 | 0,0317 |
| Salimetrics | MV | -         | -      | -      | -           | 0,0317 | 0,0952 | 0,421   | 0,556  | 0,421  |
|             | NS | -         | -      | -      | -           | -      | 0,841  | 0,0079  | 0,0079 | 0,0159 |
|             | MR | -         | -      | -      | -           | -      | -      | 0,0079  | 0,0079 | 0,0317 |
| Oragene     | MV | -         | -      | -      | -           | -      | -      | -       | 0,421  | 1      |
|             | NS | -         | -      | -      | -           | -      | -      | -       | -      | 0,309  |
|             | MR | -         | -      | -      | -           | -      | -      | -       | -      | -      |

The Wilcoxon Signed Rang test was used. In red,  $p < 0.05$  (statistically not significant); in green, statistically significant p-values.

**Table S3.** P-values corresponding to the comparison of the miRNA extraction efficiency obtained by the different combinations of saliva collectors and miRNA extraction kits applying the Wilcoxon Signed Rang test. In red,  $p < 0.05$  (statistically not significant); in green, statistically significant p-values.

|             |    | 50ml tube |        |        | Salimetrics |         |         | Oragene |         |         |
|-------------|----|-----------|--------|--------|-------------|---------|---------|---------|---------|---------|
|             |    | MV        | NS     | MR     | MV          | NS      | MR      | MV      | NS      | MR      |
| 50ml tube   | MV | -         | 0,0159 | 0,0079 | 0,151       | 0,00794 | 0,00794 | 0,6905  | 0,691   | 0,548   |
|             | NS | -         | -      | 1      | 0,0952      | 0,2222  | 0,5476  | 0,00794 | 0,0317  | 0,0317  |
|             | MR | -         | -      | -      | 0,0952      | 0,1412  | 0,5476  | 0,00794 | 0,0317  | 0,0317  |
| Salimetrics | MV | -         | -      | -      | -           | 0,00794 | 0,09524 | 0,4206  | 0,151   | 0,841   |
|             | NS | -         | -      | -      | -           | -       | 0,4206  | 0,00794 | 0,00794 | 0,00794 |
|             | MR | -         | -      | -      | -           | -       | -       | 0,00794 | 0,0317  | 0,03175 |
| Oragene     | MV | -         | -      | -      | -           | -       | -       | -       | 0,691   | 0,463   |
|             | NS | -         | -      | -      | -           | -       | -       | -       | -       | 0,691   |
|             | MR | -         | -      | -      | -           | -       | -       | -       | -       | -       |

The Wilcoxon Signed Rang test was used. In red,  $p < 0.05$  (statistically not significant); in green, statistically significant p-values.

**Table S4.** Spike-in 3 and spike-in 6 Cp values obtained by the different saliva collectors and miRNA extraction kit combinations. Values are shown in Average and standard deviation (SD).

| Spike-in | miRNA<br>extaction kit | Saliva collector |          |  |               |          |  |               |          |
|----------|------------------------|------------------|----------|--|---------------|----------|--|---------------|----------|
|          |                        | 50ml tube        |          |  | Salimetrics   |          |  | Oragene       |          |
|          |                        | Cq<br>Average    | Cq<br>SD |  | Cq<br>Average | Cq<br>SD |  | Cq<br>Average | Cq<br>SD |
| UniSp3   | MV                     | 18,74            | 0,20     |  | 18,61         | 0,40     |  | 18,55         | 0,30     |
|          | NS                     | 18,74            | 0,17     |  | 18,71         | 0,14     |  | 18,49         | 0,27     |
|          | MR                     | 18,74            | 0,30     |  | 18,72         | 0,05     |  | 18,45         | 0,20     |
| UniSp6   | MV                     | 18,56            | 0,56     |  | 18,39         | 0,55     |  | 18,29         | 0,19     |
|          | NS                     | 18,37            | 0,29     |  | 18,26         | 0,36     |  | 18,38         | 0,39     |
|          | MR                     | 18,24            | 0,22     |  | 17,97         | 0,14     |  | 18,57         | 0,56     |

**Table S5.** P-values corresponding to the comparison of the Cp values obtained from miRNA expression for the nine different combinations of collectors and extraction kits applying the Wilcoxon Signed Rang test. In red, p< 0.05 (statistically not significant); in green, statistically significant p-values.

| hsa-iR-223-3p  |         |                   |                     |                    |         |         |         |         |          |         |
|----------------|---------|-------------------|---------------------|--------------------|---------|---------|---------|---------|----------|---------|
|                |         | MV                |                     |                    | NS      |         |         | MR      |          |         |
|                |         | 50ml <sup>1</sup> | Salim. <sup>2</sup> | Orag. <sup>3</sup> | 50ml    | Salim.  | Orag.   | 50ml    | Salim.   | Orag.   |
| MV             | 50ml    |                   | 0,955               | 0,0635             | 0,336   | 0,0939  | 0,0007  | 0,0059  | 0,0059   | 0,0046  |
|                | Salim.  |                   |                     | 0,0343             | 0,0499  | 0,0148  | 0,0006  | 0,0019  | 0,0011   | 0,00054 |
|                | Orag.   |                   |                     |                    | 0,3154  | 0,762   | 0,166   | 0,286   | 0,237    | 0,123   |
| NS             | 50ml    |                   |                     |                    |         | 0,574   | 0,0086  | 0,0281  | 0,0148   | 0,00312 |
|                | Salim.  |                   |                     |                    |         |         | 0,0343  | 0,0499  | 0,0281   | 0,0266  |
|                | Orag.   |                   |                     |                    |         |         |         | 0,829   | 0,356    | 0,529   |
| MR             | 50ml    |                   |                     |                    |         |         |         |         | 0,141    | 0,274   |
|                | Salim.  |                   |                     |                    |         |         |         |         |          | 0,460   |
|                | Oragene |                   |                     |                    |         |         |         |         |          |         |
| hsa-miR-24-3p  |         |                   |                     |                    |         |         |         |         |          |         |
|                |         | MV                |                     |                    | NS      |         |         | MR      |          |         |
|                |         | 50ml              | Salim.              | Orag.              | 50ml    | Salim.  | Orag.   | 50ml    | Salim.   | Orag.   |
| MV             | 50ml    |                   | 0,189               | 0,161              | 0,152   | 0,336   | 0,0001  | 0,00031 | 0,0031   | 0,0001  |
|                | Salim.  |                   |                     | 0,0266             | 0,0104  | 0,01041 | 0,00005 | 0,00031 | 0,001933 | 0,00005 |
|                | Orag.   |                   |                     |                    | 0,633   | 0,897   | 0,0115  | 0,00055 | 0,008729 | 0,00072 |
| NS             | 50ml    |                   |                     |                    |         | 0,721   | 0,0021  | 0,00109 | 0,007362 | 0,00005 |
|                | Salim.  |                   |                     |                    |         |         | 0,0014  | 0,00109 | 0,01003  | 0,00005 |
|                | Orag.   |                   |                     |                    |         |         |         | 0,02052 | 0,1418   | 0,041   |
| MR             | 50ml    |                   |                     |                    |         |         |         |         | 1        | 0,515   |
|                | Salim.  |                   |                     |                    |         |         |         |         |          | 0,894   |
|                | Oragene |                   |                     |                    |         |         |         |         |          |         |
| hsa-miR-191-5p |         |                   |                     |                    |         |         |         |         |          |         |
|                |         | MV                |                     |                    | NS      |         |         | MR      |          |         |
|                |         | 50ml              | Salim.              | Orag.              | 50ml    | Salim.  | Orag.   | 50ml    | Salim.   | Orag.   |
| MV             | 50ml    |                   | 0,1206              | 0,0097             | 0,867   | 0,955   | 0,0097  | 0,0401  | 0,0205   | 0,0019  |
|                | Salim.  |                   |                     | 0,0025             | 0,083   | 0,130   | 0,0007  | 0,00062 | 0,0029   | 0,00005 |
|                | Orag.   |                   |                     |                    | 0,0062  | 0,0062  | 0,970   | 0,477   | 0,762    | 0,280   |
| NS             | 50ml    |                   |                     |                    |         | 0,798   | 0,0009  | 0,0104  | 0,0207   | 0,00018 |
|                | Salim.  |                   |                     |                    |         |         | 0,0016  | 0,0148  | 0,0148   | 0,00018 |
|                | Orag.   |                   |                     |                    |         |         |         | 0,307   | 0,450    | 0,140   |
| MR             | 50ml    |                   |                     |                    |         |         |         |         | 0,752    | 0,083   |
|                | Salim.  |                   |                     |                    |         |         |         |         |          | 0,173   |
|                | Oragene |                   |                     |                    |         |         |         |         |          |         |
| hsa-miR-30c-5p |         |                   |                     |                    |         |         |         |         |          |         |
|                |         | MV                |                     |                    | NS      |         |         | MR      |          |         |
|                |         | 50ml              | Salim.              | Orag.              | 50ml    | Salim.  | Orag.   | 50ml    | Salim.   | Orag.   |
| MV             | 50ml    |                   | 0,613               | 0,0068             | 0,613   | 0,354   | 0,0001  | 0,0140  | 0,0093   | 0,0021  |
|                | Salim.  |                   |                     | 0,0006             | 0,083   | 0,021   | 0,00005 | 0,0011  | 0,0011   | 0,0006  |
|                | Orag.   |                   |                     |                    | 0,01554 | 0,02052 | 0,6842  | 0,5938  | 0,7221   | 0,273   |
| NS             | 50ml    |                   |                     |                    |         | 0,4418  | 0,00009 | 0,01041 | 0,01476  | 0,0008  |

|                |         |      |        |        |        |        |         |         |         |         |
|----------------|---------|------|--------|--------|--------|--------|---------|---------|---------|---------|
|                | Salim.  |      |        |        |        |        | 0,00055 | 0,065   | 0,0281  | 0,0029  |
|                | Orag.   |      |        |        |        |        |         | 0,360   | 0,829   | 0,307   |
|                |         |      |        |        |        |        |         |         |         |         |
| MR             | 50ml    |      |        |        |        |        |         |         | 0,328   | 0,068   |
|                | Salim.  |      |        |        |        |        |         |         |         | 0,351   |
|                | Orag.   |      |        |        |        |        |         |         |         |         |
| hsa-iR-375-3p  |         |      |        |        |        |        |         |         |         |         |
|                |         | MV   |        |        | NS     |        |         | MR      |         |         |
|                |         | 50ml | Salim. | Orag.  | 50ml   | Salim. | Orag.   | 50ml    | Salim.  | Orag.   |
| MV             | 50ml    |      | 0,628  | 0,0075 | 0,181  | 0,573  | 0,118   | 0,0126  | 0,0293  | 0,0196  |
|                | Salim.  |      |        | 0,0645 | 0,536  | 0,955  | 0,417   | 0,0721  | 0,0939  | 0,0874  |
|                | Orag.   |      |        |        | 0,0014 | 0,0044 | 0,0147  | 0,965   | 0,965   | 0,241   |
| NS             | 50ml    |      |        |        |        | 0,959  | 0,101   | 0,0011  | 0,0355  | 0,0018  |
|                | Salim.  |      |        |        |        |        | 0,696   | 0,010   | 0,105   | 0,083   |
|                | Orag.   |      |        |        |        |        |         | 0,0014  | 0,237   | 0,0091  |
| MR             | 50ml    |      |        |        |        |        |         |         | 0,674   | 0,286   |
|                | Salim.  |      |        |        |        |        |         |         |         | 0,625   |
|                | Oragene |      |        |        |        |        |         |         |         |         |
| hsa-miR-27a-3p |         |      |        |        |        |        |         |         |         |         |
|                |         | MV   |        |        | NS     |        |         | MR      |         |         |
|                |         | 50ml | Salim. | Orag.  | 50ml   | Salim. | Orag.   | 50ml    | Salim.  | Orag.   |
| MV             | 50ml    |      | 1      | 0,161  | 0,0093 | 0,014  | 0,0008  | 0,00031 | 0,014   | 0,0001  |
|                | Salim.  |      |        | 0,034  | 0,0011 | 0,0029 | 0,0004  | 0,00015 | 0,0104  | 0,00005 |
|                | Orag.   |      |        |        | 0,101  | 0,146  | 0,0002  | 0,00005 | 0,0085  | 0,00001 |
| NS             | 50ml    |      |        |        |        | 0,959  | 0,011   | 0,0011  | 0,083   | 0,0021  |
|                | Salim.  |      |        |        |        |        | 0,154   | 0,0019  | 0,105   | 0,016   |
|                | Orag.   |      |        |        |        |        |         | 0,0019  | 0,398   | 0,212   |
| MR             | 50ml    |      |        |        |        |        |         |         | 0,674   | 0,674   |
|                | Salim.  |      |        |        |        |        |         |         |         | 0,790   |
|                | Oragene |      |        |        |        |        |         |         |         |         |
| hsa-iR-26b-5p  |         |      |        |        |        |        |         |         |         |         |
|                |         | MV   |        |        | NS     |        |         | MR      |         |         |
|                |         | 50ml | Salim. | Orag.  | 50ml   | Salim. | Orag.   | 50ml    | Salim.  | Orag.   |
| MV             | 50ml    |      | 0,429  | 0,333  | 0,667  | 0,889  | 0,267   | 0,178   | 0,044   | 0,909   |
|                | Salim.  |      |        | 0,945  | 0,534  | 0,628  | 0,950   | 0,020   | 0,00067 | 0,328   |
|                | Orag.   |      |        |        | 0,259  | 0,383  | 1       | 0,014   | 0,00031 | 0,252   |
| NS             | 50ml    |      |        |        |        | 1      | 0,397   | 0,054   | 0,0037  | 0,681   |
|                | Salim.  |      |        |        |        |        | 0,281   | 0,040   | 0,0037  | 0,681   |
|                | Orag.   |      |        |        |        |        |         | 0,0104  | 0,00015 | 0,199   |
| MR             | 50ml    |      |        |        |        |        |         |         | 0,574   | 0,236   |
|                | Salim.  |      |        |        |        |        |         |         |         | 0,059   |
|                | Orag.   |      |        |        |        |        |         |         |         |         |

The Wilcoxon Signed Rang test was used. In red,  $p < 0.05$  (statistically not significant); in green, statistically significant p-values. <sup>1</sup> 50 ml tube, <sup>2</sup> Salimetrics, <sup>3</sup> Oragene.
